# Supplementary material for: Antidepressant activity of an aqueous extract from okra seeds
Source: Royal Society of Chemistry journal article supplement (doi:10.1039/c8ra03201g), 2018-01-01
Supplement: c8ra03201g1.pdf [file c8ra03201g1.pdf]

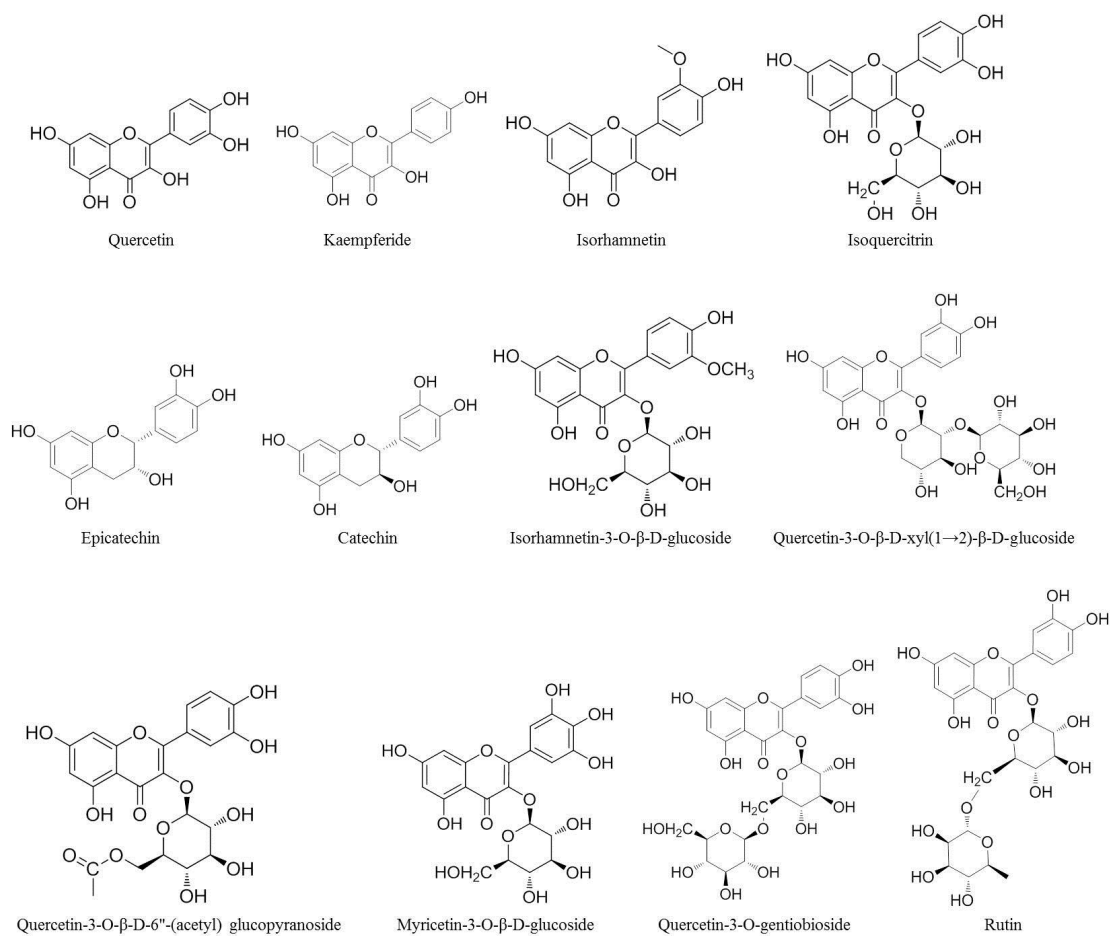

**Supplementary Figure 1.** Structure of fourteen reference compounds

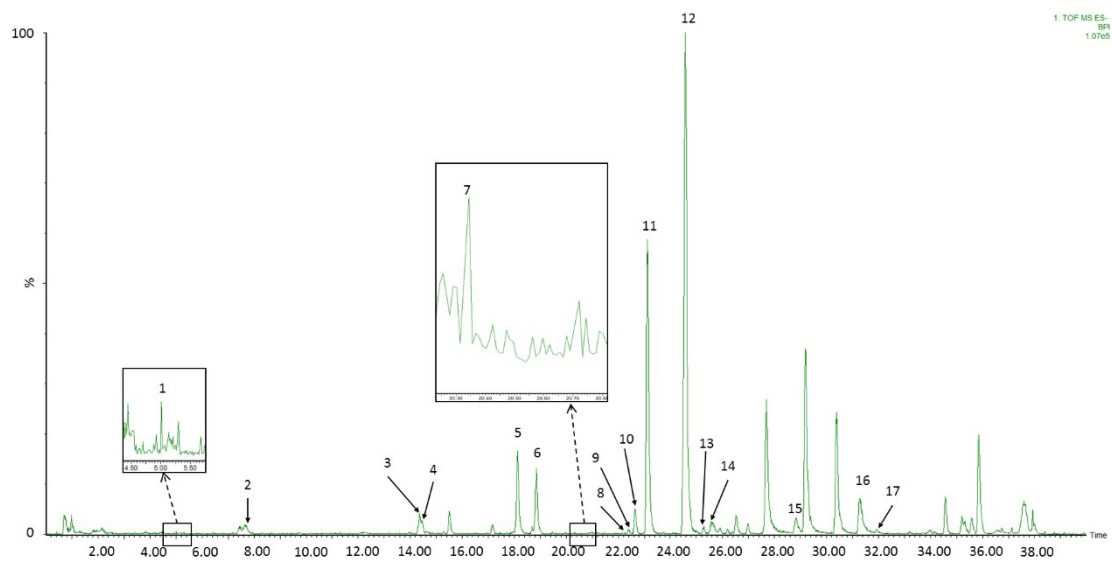

**Supplementary Figure 2.** Total Ion Chromatogram of Okra Seed extract (OSE) under the Negative Ion Mode
